# Supplementary material for: Real-time monitoring of self-assembling worm-like micelle formation by organic transistors
Source: Royal Society of Chemistry journal article supplement (doi:10.1039/c4ra14118k), 2015-01-01
Supplement: c4ra14118k1.pdf [file c4ra14118k1.pdf]

## **Supporting Information**

### **“Real-time monitoring of self-assembling wormlike micelle formation by organic transistors”**

V. Preziosi, G. Tarabella, P. D'Angelo, A. Romeo, M. Barra, S. Guido, A. Cassinese  
and S. Iannotta.

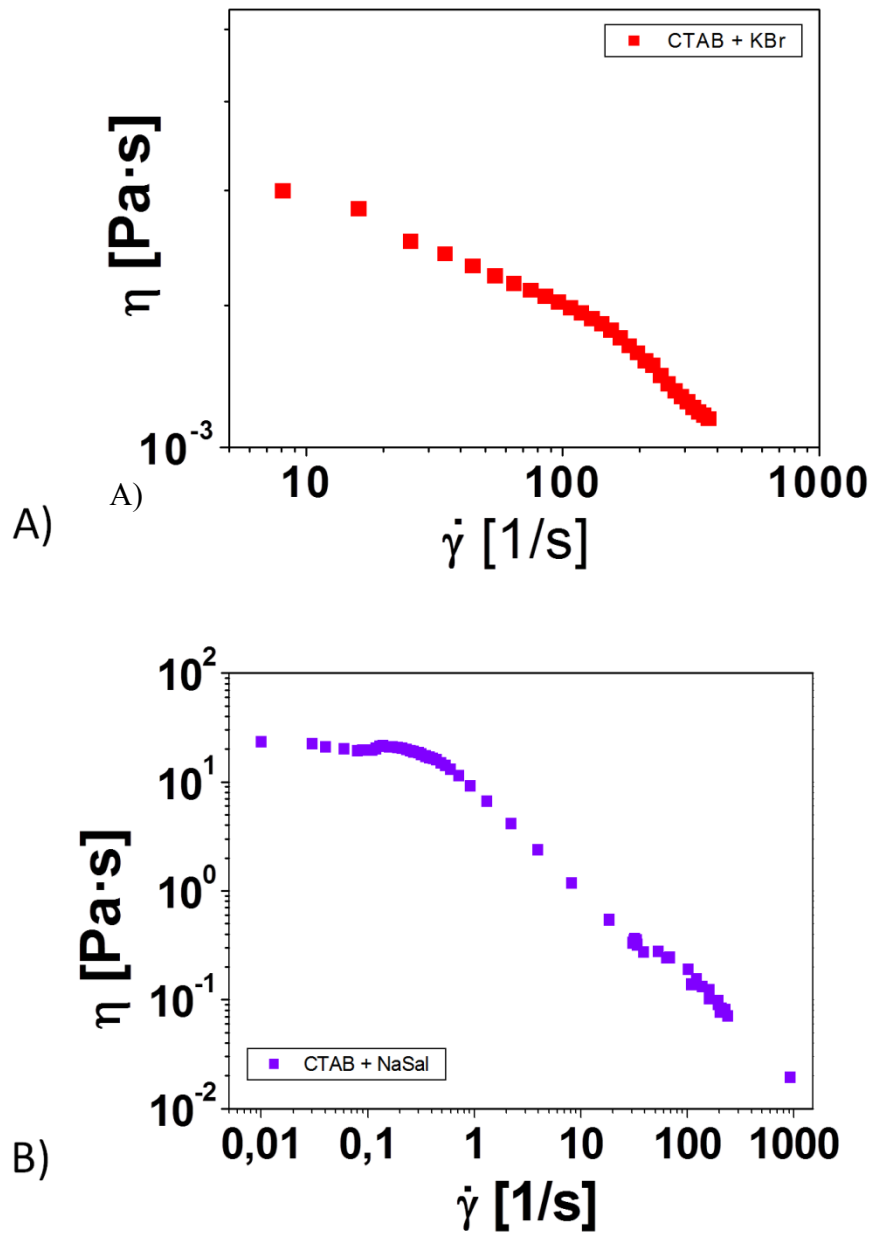

**Fig.S1** Steady shear rate measurements for A) CTAB+KBr and B) CTAB+NaSal worm-like solutions.

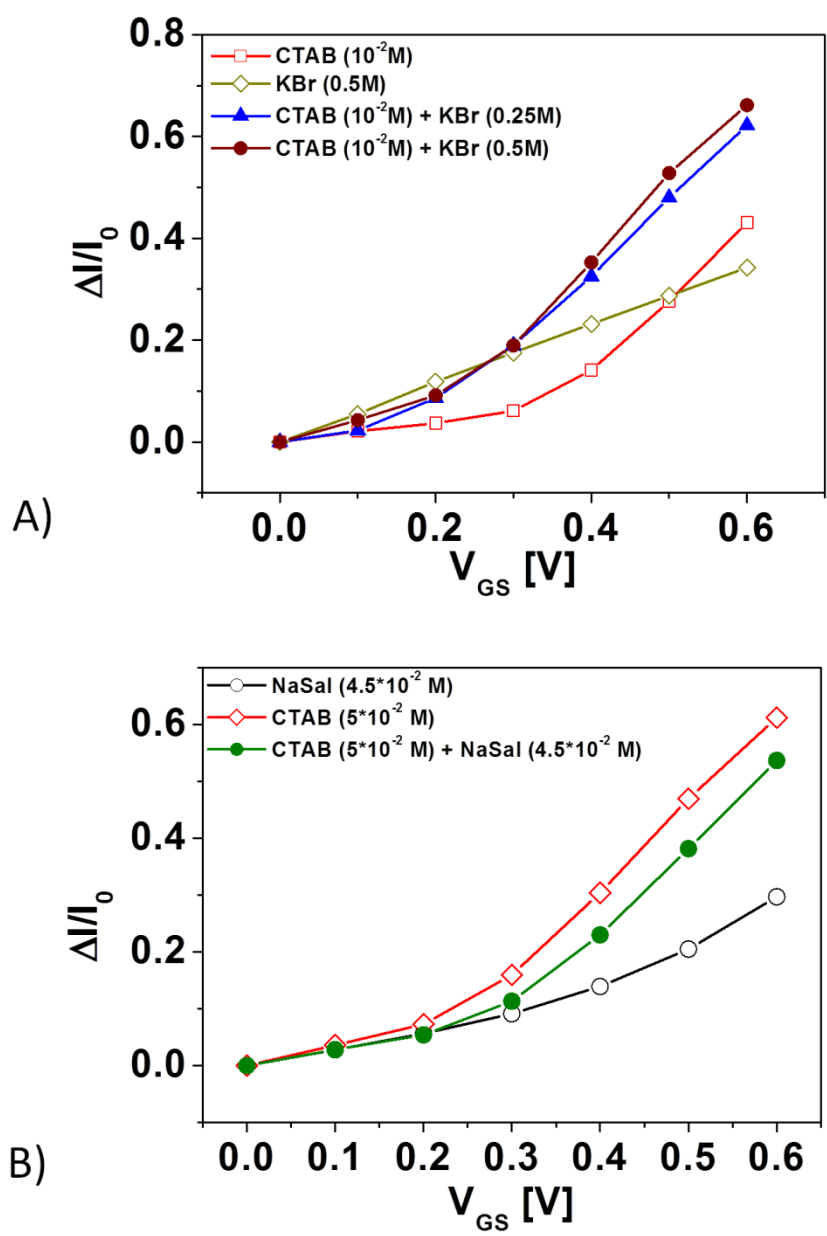

**Fig. S2** Current modulation data ( $\Delta I=(I-I_0)/I_0$ ) extracted from the corresponding transfer-curves (Fig.5, in the manuscript) for A) (CTAB, KBr and CTAB+KBr) and B) (CTAB, NaSal and CTAB+NaSal) solutions. In these plots, worm-like solutions are identified by closed symbols.

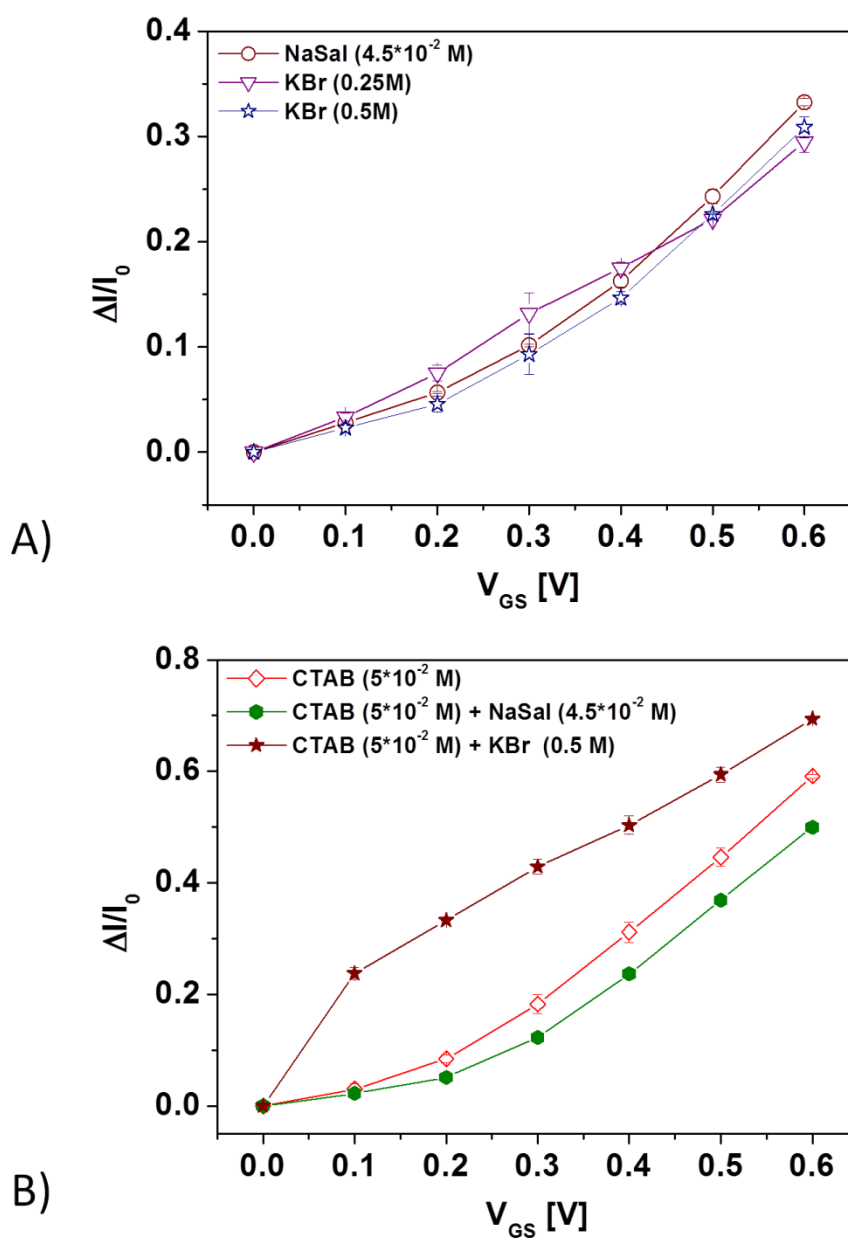

**Fig. S3** Current modulation data ( $\Delta I = (I - I_0)/I_0$ ) vs  $V_{GS}$  extracted for A) NaSal 0.045 M, KBr 0.25M and KBr=0.5M and B) CTAB 0.05M, (CTAB 0.05M + NaSal 0.045M) and (CTAB 0.05M + KBr 0.5M) solutions. In these plots, worm-like solutions are identified by closed symbols.
